# Supplementary material for: Release of Matrix Metalloproteinases-2 and 9 by S-Nitrosylated Caveolin-1 Contributes to Degradation of Extracellular Matrix in tPA-Treated Hypoxic Endothelial Cells
Source: PLoS One. 2016 Feb 16;11(2):e0149269. doi: 10.1371/journal.pone.0149269 (PMC4755609; doi:10.1371/journal.pone.0149269)
Supplement: S1 Table — TPA promotes MMP2 and 9-mediated fibronectin and laminin β-1 degradation in OGD-treated endothelial cells. (XLSX) [file pone.0149269.s001.xlsx]

## Sheet: Sheet1
			A
			Fb		LMNb-1
			Mean	Standard Error	Mean	Standard Error
			1	0.095	1	0.125
			1.093	0.063	1.062	0.071
			0.972	0.078	1.008	0.144
			0.432	0.033	0.306	0.075
			B
			MMP2		MMP9
			Mean	Standard Error	Mean	Standard Error
			1	0.081	1	0.148
			0.969	0.106	1.108	0.053
			1.113	0.159	1.034	0.106
			2.119	0.848	1.834	0.117
			C
			Fb		LMNb-1		Fb		LMNb-1
			Mean	Standard Error	Mean	Standard Error	Mean	Standard Error	Mean	Standard Error
			1	0.119	1	0.162	1	0.068	1	0.043
			1.102	0.085	0.994	0.09	1.122	0.102	1.045	0.093
			1.051	0.102	1.037	0.144	1.062	0.051	1.071	0.061
			0.272	0.059	0.399	0.085	1	0.11	1	0.115
